# Supplementary material
Source: Springer Nature journal article supplement (https://www.springermedizin.de/resource/supplementary/12883_2010_311_MOESM4_ESM.pdf/9455120)
Supplement: MOESM4 [file 9455120]

TIC: 2.4  
S4XC  
06 MAY 08  
14:01:32  
2/3/E/L1/J  
AZM

# A

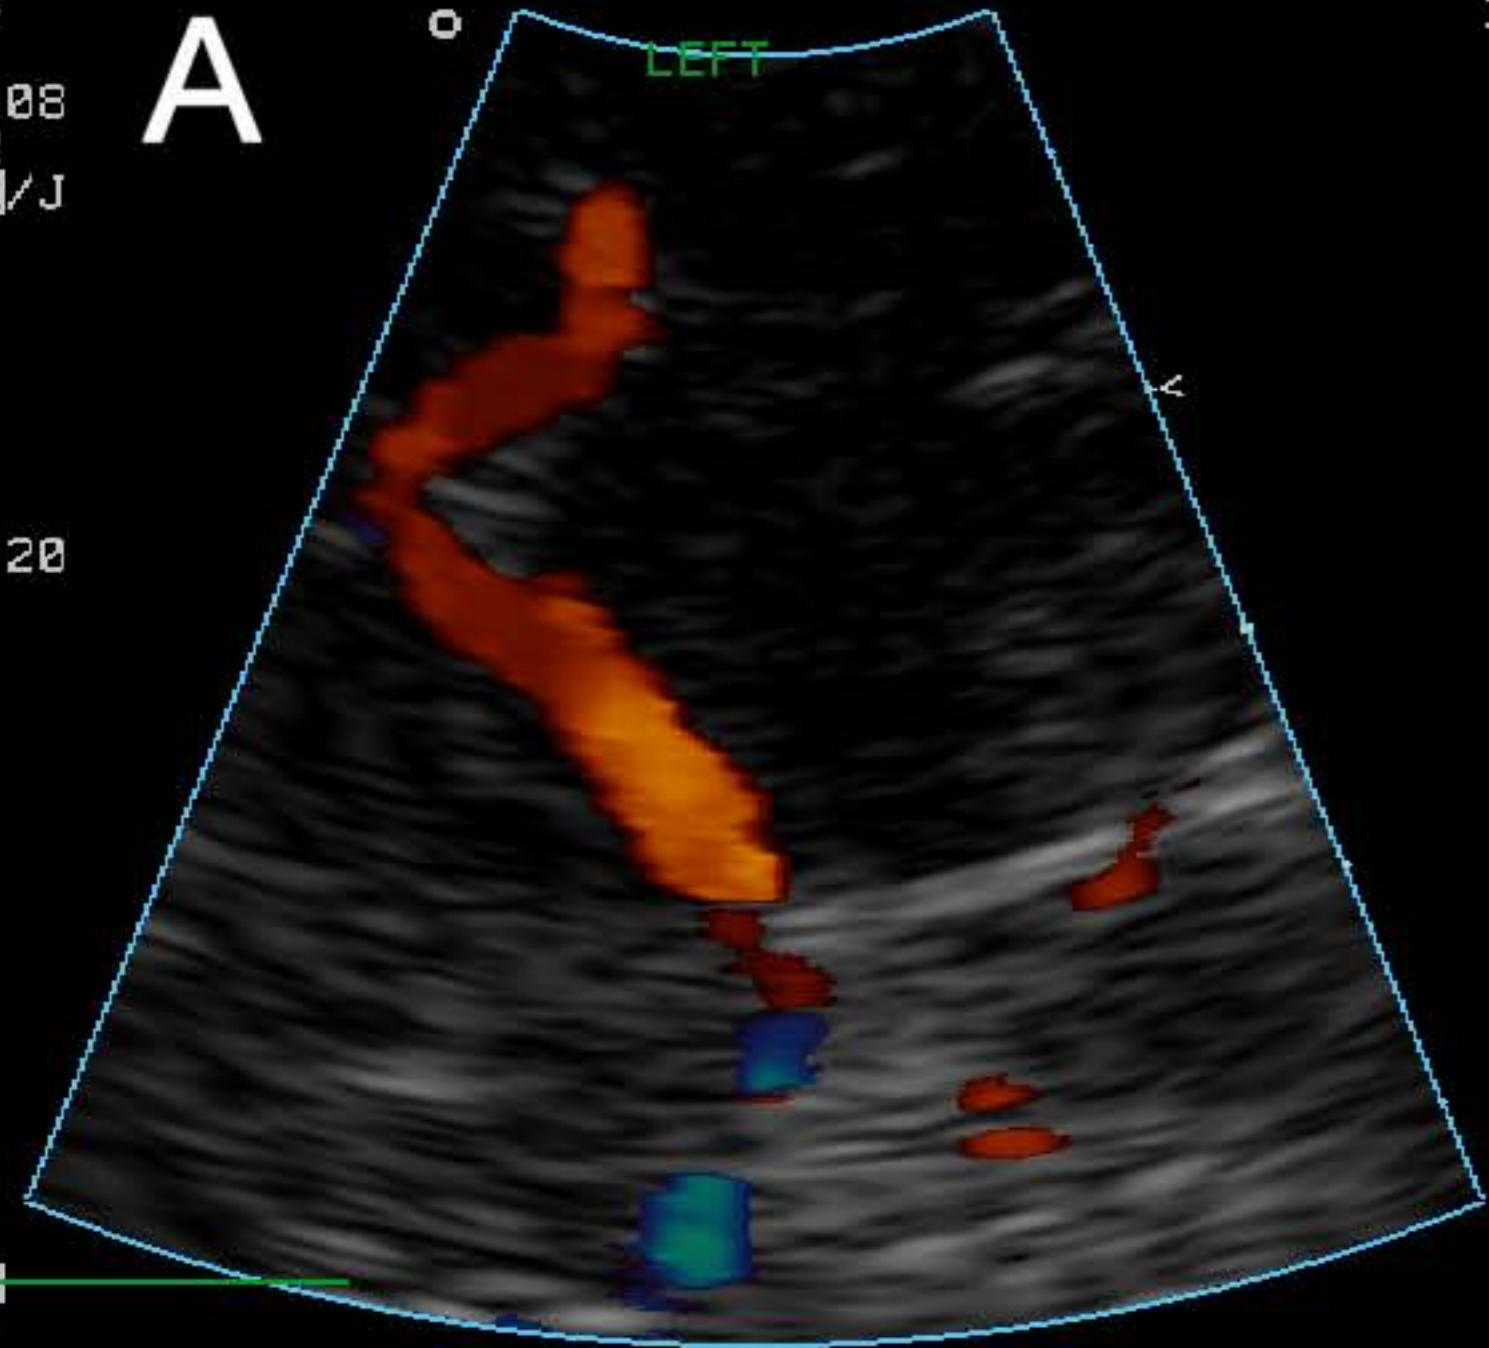

TCD NEW

GN

0:01:20  
GAIN 72  
COMP 70

10CM  
12HZ

PHILIPS 4

1.8MHz  
63  
C  
S  
63

TIC: 1.3  
S4XC  
06 MAY 08  
14:02:40  
2/3/E/L1/J  
AZM

# B

TCD NEW

GN

0:01:20  
GAIN 72  
COMP 70

10CM

GATE: 5.2CM  
LEN: 0.35CM  
e: 41  
▽= 20

PHILIPS

LEFT MCA

1.8MHz

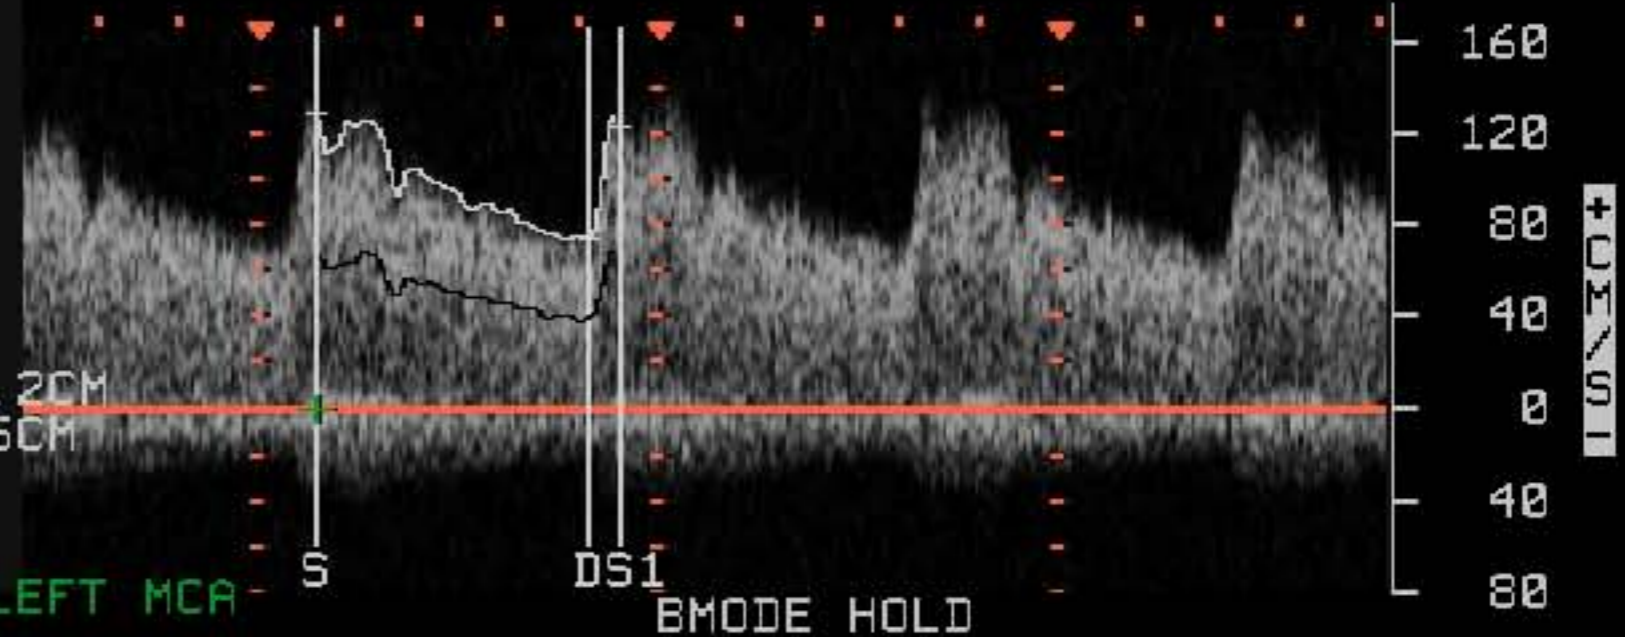

|       |      |      |
|-------|------|------|
| A + S | 131  | cm/s |
| D     | 75.4 | cm/s |
| MN    | 99.2 | cm/s |
| AT    | .080 | sec  |
| TAVM  | 53.2 | cm/s |
| S/D   | 1.74 |      |
| PI    | .560 |      |
| RI    | .424 |      |

1.8MHz  
63  
C  
S  
63
